# Supplementary material for: Reaction routes in catalytic reforming of poly(3-hydroxybutyrate) into renewable hydrocarbon oil
Source: Royal Society of Chemistry journal article supplement (doi:10.1039/c5ra03195h), 2015-01-01
Supplement: c5ra03195h1.pdf [file c5ra03195h1.pdf]

## Supporting information

### Reaction routes in catalytic reforming of poly(3-hydroxybutyrate) into renewable hydrocarbon oil

Shimin Kang<sup>a</sup> and Jian Yu<sup>\*a</sup>

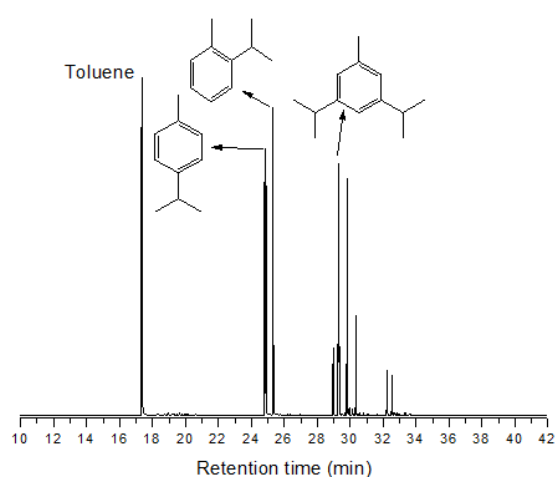

Fig. S1. GCMS spectrum of alkylation products from toluene and propylene under the typical reaction conditions.

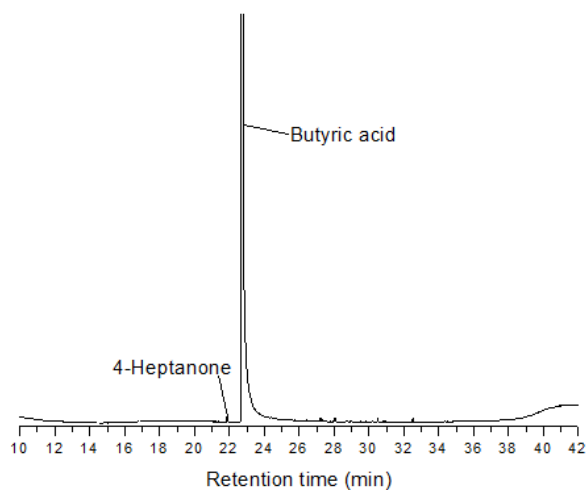

Fig. S2. GCMS spectrum of the products from butyric acid reaction in 100%  $\text{H}_3\text{PO}_4$  at 220 °C for 3 hours.

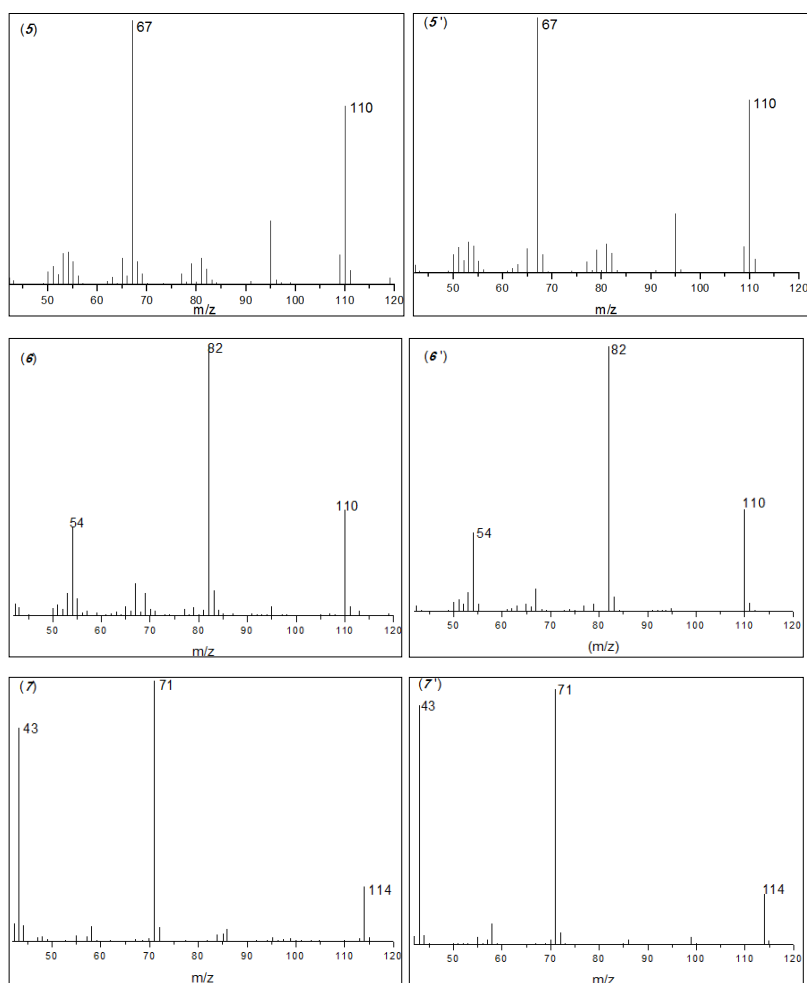

Fig. S3. GCMS mass spectra of initial intermediates 2,3-dimethyl-2-cyclopenten-1-one (**5**) and 3-methyl-2-cyclohexen-1-one (**6**) from PHB reaction and 4-heptanone (**7**) from butyric acid reaction. **5'** and **6'** are the mass spectra of pure 2,3-dimethyl-2-cyclopenten-1-one and pure 3-methyl-2-cyclohexen-1-one, respectively. **7'** is 4-heptanone's standard reference spectra from NIST 11 mass spectral library.

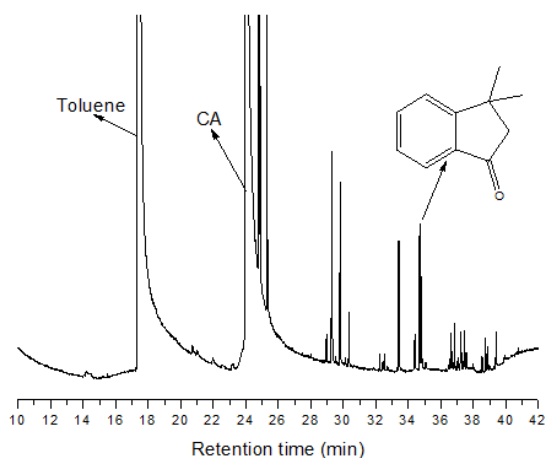

Fig. S4. GCMS spectrum of acylation products from toluene and crotonic acid in 100%  $\text{H}_3\text{OP}_4$  at 150 °C for 3 hours.
